# Supplementary material for: The monophyly of Crenuchinae and description of two new species ofPoecilocharax(Teleostei: Crenuchidae) based on phenotypic and genotypic evidence
Source: Oxford University Press journal article supplement (doi:10.1093/zoolinnean/zlac026), 2022-03-02
Supplement: zlac026_suppl_supplementary_table_s2.xls [file zlac026_suppl_supplementary_table_s2.xls]

## Sheet: MatrixOutput
Poecilocharax bovaliorum_AUM2182
Crenuchus spilurus_LBP23869	0.238608
Crenuchus spilurus_P29500	0.231046	0.153646
Crenuchus spilurus_P29501	0.228625	0.151265	0.00321028
Poecilocharax weitzmani_P29842	0.240299	0.237055	0.253513	0.248587
Poecilocharax weitzmani_P29843	0.240299	0.238938	0.255177	0.250251	0
Poecilocharax weitzmani_LBP40500	0.272715	0.270374	0.261149	0.263674	0.181486	0.181147
Poecilocharax weitzmani_P29425	0.254162	0.25089	0.217989	0.215679	0.167318	0.169182	0.0979205
Poecilocharax weitzmani_P29427	0.254162	0.25089	0.217989	0.215679	0.167318	0.169182	0.0979205	0
Poecilocharax weitzmani_P29426	0.251611	0.24535	0.21338	0.211092	0.167318	0.169182	0.0979205	0.00321028	0.00321028
Poecilocharax callipterus_MZict3037	0.242853	0.221429	0.239181	0.236765	0.194383	0.196063	0.264668	0.204698	0.204698	0.204698
Poecilocharax callipterus_MZict3038	0.241204	0.221429	0.240044	0.237599	0.196984	0.198684	0.268448	0.207451	0.207451	0.207451	0
Poecilocharax rizophilus_MZict6194	0.234802	0.238644	0.206124	0.203877	0.221221	0.222894	0.263891	0.198225	0.198225	0.202621	0.175475	0.175579
Poecilocharax rizophilus_MZict6191	0.231734	0.246606	0.209193	0.206795	0.224808	0.224808	0.262995	0.196071	0.196071	0.200711	0.174111	0.174205	0.00169779
Poecilocharax rizophilus_MZict6193	0.21955	0.24799	0.211724	0.211724	0.21955	0.21955	0.259125	0.191373	0.191373	0.196883	0.151534	0.151329	0.0020202	0
Poecilocharax rizophilus_MZict6192	0.232333	0.235955	0.203877	0.20164	0.218927	0.2206	0.261397	0.196042	0.196042	0.200418	0.173296	0.173377	0.00160257	0	0

## Sheet: Caption
Table. Estimates of Evolutionary Divergence between Sequences
The number of base substitutions per site from between sequences are shown. Analyses were conducted using the Kimura 2-parameter model [1]. This analysis involved 16 nucleotide sequences. Codon positions included were 1st+2nd+3rd+Noncoding. All ambiguous positions were removed for each sequence pair (pairwise deletion option). There were a total of 625 positions in the final dataset. Evolutionary…
1. Kimura M. (1980). A simple method for estimating evolutionary rate of base substitutions through comparative studies of nucleotide sequences. Journal of Molecular Evolution 16:111-120.
2. Kumar S., Stecher G., Li M., Knyaz C., and Tamura K. (2018). MEGA X: Molecular Evolutionary Genetics Analysis across computing platforms. Molecular Biology and Evolution 35:1547-1549.
Disclaimer: Although utmost care has been taken to ensure the correctness of the caption, the caption text is provided "as is" without any warranty of any kind. Authors advise the user to carefully check the caption prior to its use for any purpose and report any errors or problems to the authors immediately (www.megasoftware.net). In no event shall the authors and their employers be liable for a…
